# Supplementary material
Source: HighWire-hosted journal article supplement (http://www.cmaj.ca/highwire/filestream/58228/field_highwire_adjunct_files/4/know-clark-5-at_online.pdf)
Supplement: know-clark-5-at_online.pdf [file know-clark-5-at_online.pdf]

**Appendix 5:** Responses from 101 Members of Parliament and senior aides when asked to identify what CIHR does well and what it does poorly

| What CIHR does well                                             | % of times strength was mentioned* | What CIHR does poorly                                                         | % of times weakness was mentioned* |
|-----------------------------------------------------------------|------------------------------------|-------------------------------------------------------------------------------|------------------------------------|
| Don't know                                                      | 61.4                               | Don't know                                                                    | 62.4                               |
| Conducts good research                                          | 10.9                               | Communicates poorly                                                           | 12.9                               |
| Leverages buying power, uses partnerships to be more efficient  | 6.9                                | Supports immoral research such as stem cell research                          | 5.9                                |
| Maintains high standards of research, research is peer-reviewed | 5.9                                | Favours research conducted in Ontario and Quebec, excludes regional proposals | 4.0                                |
| Improves the quality of Canadian research                       | 5.9                                | Does not place enough emphasis on public education and involvement            | 3.0                                |
| Collaborates well with other organizations                      | 5.9                                | Other†                                                                        | 17.0                               |
| Manages funding efficiently, ensures a return on investment     | 5.0                                |                                                                               |                                    |
| Improves Canadians' knowledge of general health issues          | 4.0                                |                                                                               |                                    |
| Supports a broad range of research                              | 3.0                                |                                                                               |                                    |
| Other†                                                          | 22.8                               |                                                                               |                                    |

Note: CIHR = Canadian Institutes of Health Research.

\*Percentages do not add to 100 because multiple responses were allowed.

†“Other” represents unique responses (14 strengths and 15 weaknesses), each mentioned by no more than 2 respondents.
